# Supplementary material
Source: PubMed Central journal article supplement (PMC523448)
Supplement: pnas_101_42_15148__1.pdf [file pnas_101_42_15148__1.pdf]

**Table 4. Expert AD genes**

| No. | SP ID  | Symbol        | No. | SP ID  | Symbol       | No. | SP ID  | Symbol          |
|-----|--------|---------------|-----|--------|--------------|-----|--------|-----------------|
| 1   | P01023 | <i>A2M</i>    | 21  | Q05586 | <i>GRIN1</i> | 41  | P27986 | <i>PIK3R1</i>   |
| 2   | O00213 | <i>APBB1</i>  | 22  | P49841 | <i>GSK3B</i> | 42  | Q13526 | <i>PIN1</i>     |
| 3   | P02649 | <i>APOE</i>   | 23  | O19673 | <i>HCAA</i>  | 43  | P04054 | <i>PLA2G1B</i>  |
| 4   | P05067 | <i>APP</i>    | 24  | P09601 | <i>HMOX1</i> | 44  | P00749 | <i>PLAU</i>     |
| 5   | P56817 | <i>BACE</i>   | 25  | P14735 | <i>IDE</i>   | 45  | P27169 | <i>PON1</i>     |
| 6   | P23560 | <i>BDNF</i>   | 26  | P01584 | <i>IL1B</i>  | 46  | P04156 | <i>PRNP</i>     |
| 7   | Q13867 | <i>BLMH</i>   | 27  | P05231 | <i>IL6</i>   | 47  | P49768 | <i>PSEN1</i>    |
| 8   | P21730 | <i>C5R1</i>   | 28  | P01130 | <i>LDLR</i>  | 48  | P49810 | <i>PSEN2</i>    |
| 9   | P16671 | <i>CD36</i>   | 29  | P06858 | <i>LPL</i>   | 49  | O00767 | <i>SCD</i>      |
| 10  | P06493 | <i>CDC2</i>   | 30  | Q07954 | <i>LRP1</i>  | 50  | P01009 | <i>SERPINA1</i> |
| 11  | Q00535 | <i>CDK5</i>   | 31  | P45983 | <i>MAPK8</i> | 51  | P31645 | <i>SLC6A4</i>   |
| 12  | Q15078 | <i>CDK5R1</i> | 32  | P08473 | <i>MME</i>   | 52  | P37840 | <i>SNCA</i>     |
| 13  | P11229 | <i>CHRM1</i>  | 33  | P05164 | <i>MPO</i>   | 53  | O76070 | <i>SNCG</i>     |
| 14  | P20309 | <i>CHRM3</i>  | 34  | P25713 | <i>MT3</i>   | 54  | P00441 | <i>SOD1</i>     |
| 15  | P10909 | <i>CLU</i>    | 35  | P00395 | <i>MTCO1</i> | 55  | Q92777 | <i>SYN2</i>     |
| 16  | Q05193 | <i>DNM1</i>   | 36  | P42898 | <i>MTHFR</i> | 56  | P08247 | <i>SYP</i>      |
| 17  | P53805 | <i>DSCR1</i>  | 37  | P08138 | <i>NGFR</i>  | 57  | Q9UMH0 | <i>TAU</i>      |
| 18  | P42892 | <i>ECE1</i>   | 38  | P29474 | <i>NOS3</i>  | 58  | P01137 | <i>TGFB1</i>    |
| 19  | P03372 | <i>ESR1</i>   | 39  | P20783 | <i>NTF3</i>  | 59  | P25445 | <i>TNFRSF6</i>  |
| 20  | P12259 | <i>F5</i>     | 40  | P04629 | <i>NTRK1</i> | 60  | P98155 | <i>VLDLR</i>    |

SP ID, SwissProt identifier.
