# Supplementary material
Source: PubMed Central journal article supplement (PMC523448)
Supplement: pnas_101_42_15148__2.pdf [file pnas_101_42_15148__2.pdf]

**Table 5. Ranking of the top 50 network nodes after seeding with four AD susceptibility genes**

| Rank*    | Sec. ev.    | <i>P</i> value <sub>r</sub> | SP ID                | Symbol              | <i>P</i> value <sub>ts</sub> | Rank | Sec. ev. | <i>P</i> value <sub>r</sub> | SP ID         | Symbol     | <i>P</i> value <sub>ts</sub> |
|----------|-------------|-----------------------------|----------------------|---------------------|------------------------------|------|----------|-----------------------------|---------------|------------|------------------------------|
| <b>1</b> | <b>2.33</b> | <b>0.0000</b>               | <b><i>P49768</i></b> | <b><i>PSEN1</i></b> | <b>0.0000</b>                | 26   | 1.50     | 0.0013                      | Q92793        | CREBBP     | 0.0117                       |
| <b>2</b> | <b>2.33</b> | <b>0.0000</b>               | <b><i>P05067</i></b> | <b><i>APP</i></b>   | <b>0.0000</b>                | 27   | 1.50     | 0.0013                      | P12931        | SRC        | 0.0323                       |
| <b>3</b> | <b>2.08</b> | <b>0.0000</b>               | <b><i>P49810</i></b> | <b><i>PSEN2</i></b> | <b>0.0000</b>                | 28   | 1.50     | 0.0015                      | P35222        | CTNNB1     | 0.0003                       |
| <b>4</b> | <b>2.08</b> | <b>0.0000</b>               | <b><i>P02649</i></b> | <b><i>APOE</i></b>  | <b>0.0000</b>                | 29   | 1.50     | 0.0015                      | Q13285        | NR5A1      | 0.0006                       |
| 5        | 1.67        | 0.0006                      | <i>P09601</i>        | <i>HMOX1</i>        | 0.0000                       | 30   | 1.50     | 0.0015                      | P27635        | RPL10      | 0.0006                       |
| 6        | 1.67        | 0.0006                      | P24410               | RAB11A              | 0.0000                       | 31   | 1.50     | 0.0015                      | P19883        | FST        | 0.0011                       |
| 7        | 1.67        | 0.0006                      | Q02410               | APBA1               | 0.0003                       | 32   | 1.50     | <i>0.0015</i>               | <i>P06858</i> | <i>LPL</i> | <i>0.0011</i>                |
| 8        | 1.67        | 0.0006                      | <i>P56817</i>        | <i>BACE</i>         | 0.0003                       | 33   | 1.50     | 0.0015                      | P21675        | TAF1       | 0.0011                       |
| 9        | 1.67        | 0.0006                      | P46531               | NOTCH1              | 0.0003                       | 34   | 1.50     | 0.0015                      | P18850        | ATF6       | 0.0014                       |
| 10       | 1.67        | 0.0006                      | P01266               | TG                  | 0.0006                       | 35   | 1.50     | 0.0015                      | P08651        | NFIC       | 0.0017                       |
| 11       | 1.67        | 0.0006                      | Q14192               | FHL2                | 0.0011                       | 36   | 1.50     | 0.0015                      | P08571        | CD14       | 0.0020                       |
| 12       | 1.67        | 0.0006                      | Q16208               | LHR                 | 0.0017                       | 37   | 1.50     | 0.0015                      | P49366        | DHPS       | 0.0029                       |
| 13       | 1.67        | 0.0006                      | P16220               | CREB1               | 0.0017                       | 38   | 1.50     | 0.0015                      | P55290        | CDH13      | 0.0029                       |
| 14       | 1.67        | 0.0006                      | Q09472               | EP300               | 0.0020                       | 39   | 1.50     | 0.0015                      | P24855        | DNASE1     | 0.0034                       |
| 15       | 1.67        | 0.0006                      | P20132               | SDS                 | 0.0069                       | 40   | 1.50     | <i>0.0015</i>               | <i>Q9UMH</i>  | <i>TAU</i> | <i>0.0040</i>                |
| 16       | 1.67        | 0.0006                      | <i>P03372</i>        | <i>ESR1</i>         | <i>0.0137</i>                | 41   | 1.50     | 0.0015                      | Q13510        | ASAH1      | 0.0046                       |
| 17       | 1.58        | 0.0010                      | P30626               | SRI                 | 0.0003                       | 42   | 1.50     | 0.0015                      | P09038        | FGF2       | 0.0049                       |
| 18       | 1.58        | 0.0010                      | Q13201               | ECM                 | 0.0023                       | 43   | 1.50     | 0.0015                      | P12830        | CDH1       | 0.0057                       |
| 19       | 1.50        | 0.0013                      | Q12866               | MERTK               | 0.0006                       | 44   | 1.50     | 0.0015                      | P14210        | HGF        | 0.0074                       |
| 20       | 1.50        | 0.0013                      | P55036               | PSMD4               | 0.0009                       | 45   | 1.50     | 0.0015                      | P35610        | SOAT1      | 0.0083                       |
| 21       | 1.50        | 0.0013                      | O95822               | MLYCD               | 0.0014                       | 46   | 1.50     | 0.0015                      | P17080        | RAN        | 0.0086                       |
| 22       | 1.50        | 0.0013                      | P38398               | BRCA1               | 0.0026                       | 47   | 1.50     | 0.0015                      | P00750        | PLAT       | 0.0097                       |
| 23       | 1.50        | 0.0013                      | P05412               | JUN                 | 0.0029                       | 48   | 1.50     | 0.0015                      | P11498        | PC         | 0.0134                       |
| 24       | 1.50        | 0.0013                      | P25054               | APC                 | 0.0031                       | 49   | 1.50     | 0.0015                      | P20226        | TBP        | 0.0174                       |
| 25       | 1.50        | 0.0013                      | Q06124               | PTPN11              | 0.0080                       | 50   | 1.50     | 0.0015                      | P43320        | CRYBB2     | 0.0214                       |

Bold, nodes with primary evidence; italics, AD expert genes; *P* value<sub>r</sub>, raw *P* value; *P* value<sub>ts</sub>, topology-subtracted *P* value; SP ID, SwissProt identifier; Sec. ev., secondary evidence value.

\*Sorted by raw *P* values.
